# Supplementary material for: Delineation of prognostic biomarkers in prostate cancer
Source: Springer Nature journal article supplement (doi:10.1038/35090585), 2001-08-01

Dhanasekaran  
Supplemental Figure 2

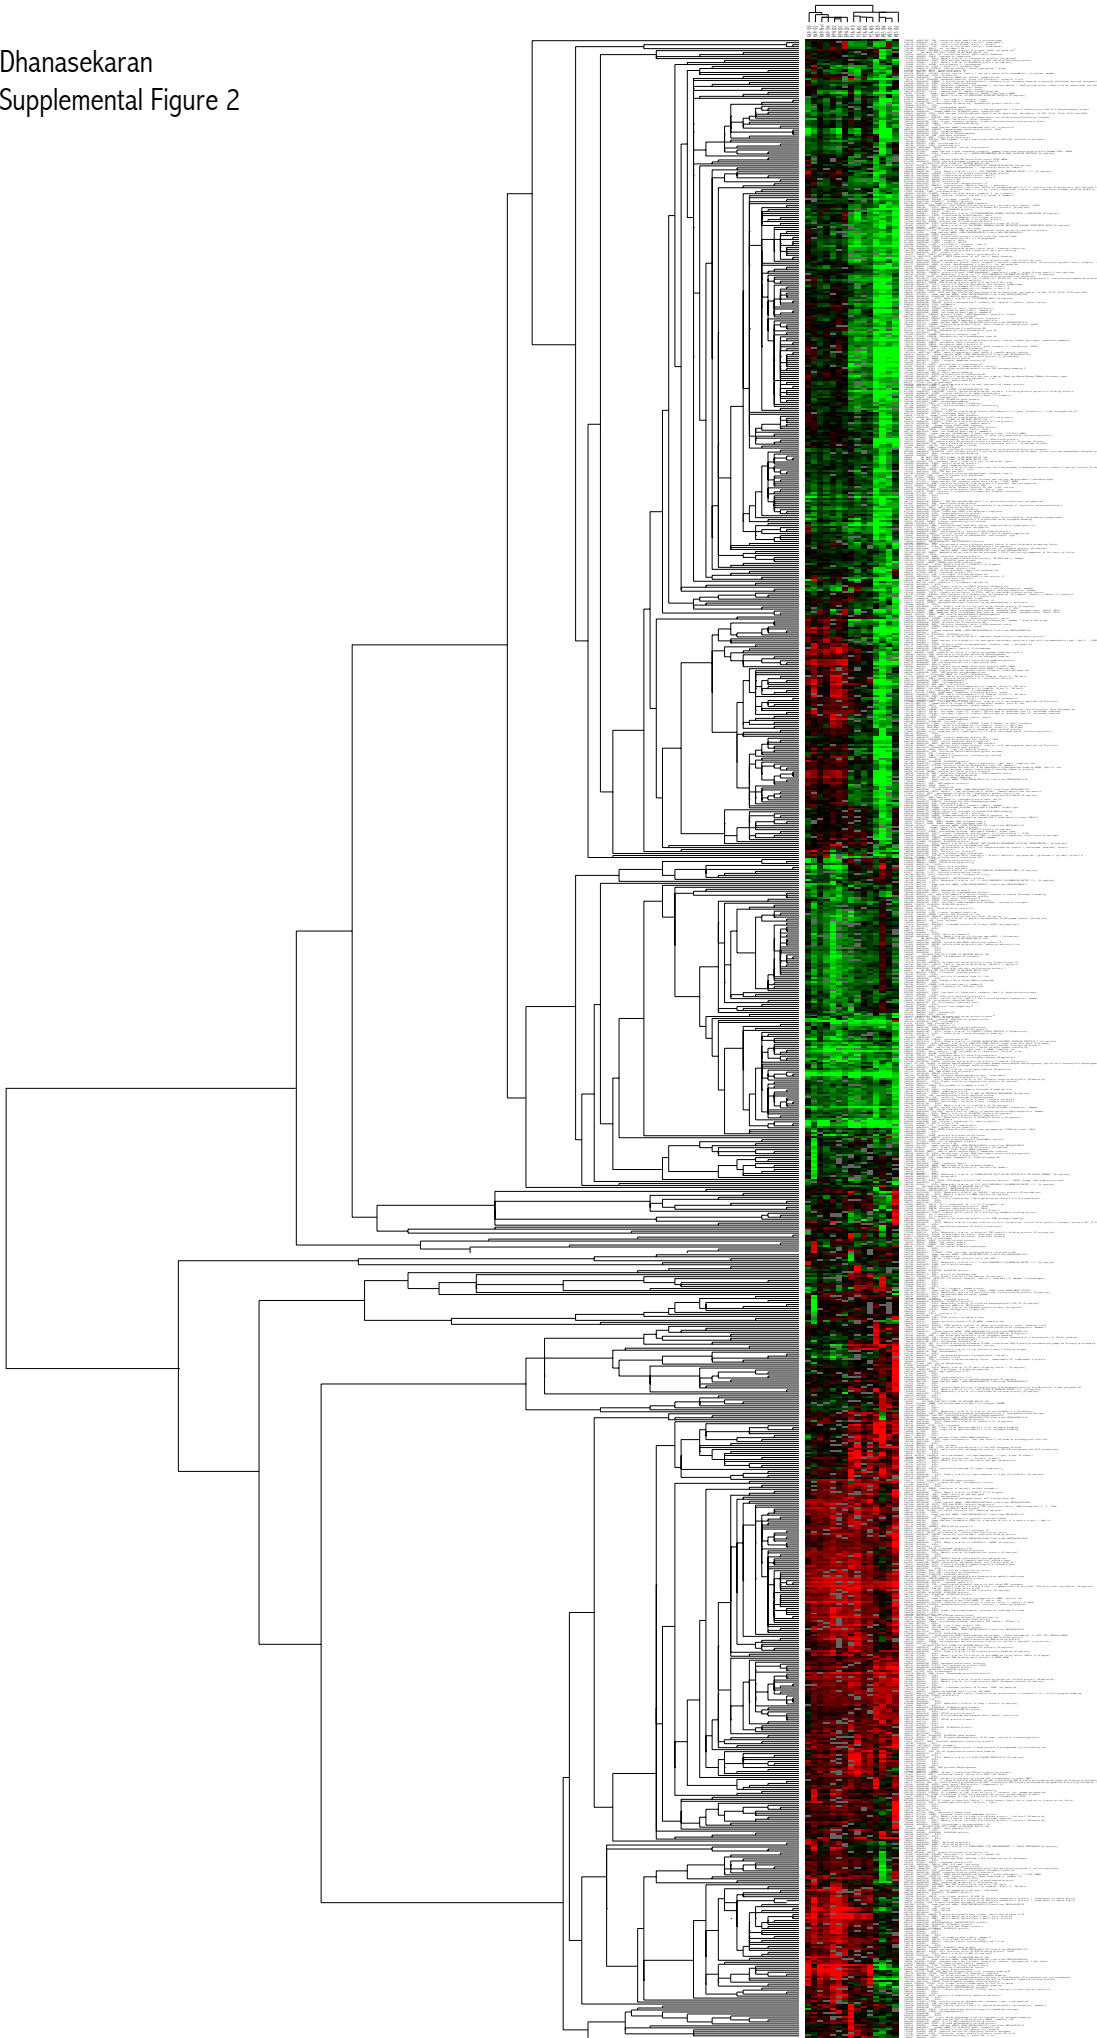

Supplement: 41586_2001_BF35090585_MOESM2_ESM.pdf [file 41586_2001_BF35090585_MOESM2_ESM.pdf]
